# Supplementary material for: Elevation Change of the Greenland Ice Sheet and its Peripheral Glaciers: 1992–2023
Source: Copernicus journal article supplement (doi:10.5194/essd-2024-311), 2024-10-21
Supplement: Supplementary file [file essd-2024-311-RC2-supplement.pdf]

## **Review of Nilsson and Gardner: Elevation change of the Greenland ice sheet...**

An excellent and clearly written paper, with the a sound methodology of remove-restore. It is especially to see how useful the CryoSat SARin mode has performed relative to IceSat-2. This is a landmark paper on Greenland ice sheet changes.

It would be useful to mention the use of outlet glacier ice velocity for elevation changes already in the abstract, since this is not a "clean" elevation change paper. Also, could be useful to include in one of the figures the outline of the peripheral glaciers - not all readers know the Bolsch et al reference, and the definition of "peripheral glaciers" there are controversial (a large part of the central East Greenland ice sheet south of Scoresbysund is e.g. classified as "glacier" even though it is not (just an area of ice sheet with Nunataks). Therefore the split quoted between "glaciers" and "ice sheets" is somewhat ambitious.
